# Supplementary material for: Cancer Spheroids Embedded in Tissue-Engineered Skin Substitutes: A New Method to Study Tumorigenicity In Vivo
Source: MDPI journal article supplement (doi:10.3390/ijms25031513), 2024-01-26
Supplement: s1 [file s1]

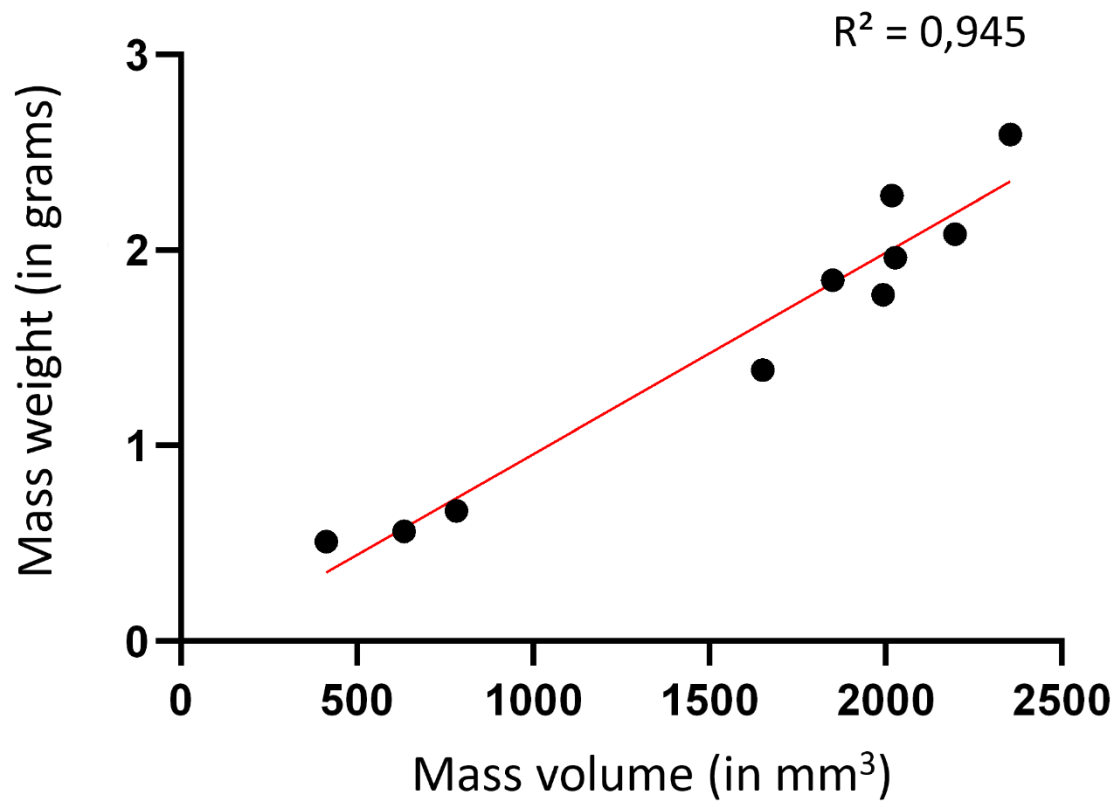

**Figure S1.** Correlation analysis of weight versus volume measurements. Volumes were estimated using length, width and height of the mass and the formula for an ellipsoid (length x width x height x pi/6). Tumors were weighted after retrieval. Spearman's correlation analysis showed significant correlation ( $r=0,9515$ ,  $P\text{-value} < 0,001$ ) and simple linear regression showed a  $R^2$  of 0,9451. Linear curve is shown in red.
